# Supplementary material for: A Spherical Hybrid Triboelectric Nanogenerator for Enhanced Water Wave Energy Harvesting
Source: MDPI journal article supplement (doi:10.3390/mi9110598), 2018-11-15
Supplement: s1 [file s1]

## Supplementary Information

### Spherical hybrid triboelectric nanogenerator for enhanced water wave energy harvesting

Kwangseok Lee <sup>1</sup>, Jeong-won Lee <sup>1</sup>, Kihwan Kim <sup>1</sup>, Donghyeon Yoo <sup>1</sup>, Insang Song <sup>3</sup>, Dong Sung Kim <sup>1</sup>, Jae-Yoon Sim <sup>2</sup> and Woonbong Hwang <sup>1,\*</sup>

<sup>1</sup> Department of Mechanical Engineering, Pohang University of Science and Technology (POSTECH), Pohang 37673, Republic of Korea; [shepherd@postech.ac.kr](mailto:shepherd@postech.ac.kr) (K.L.); [aaron@postech.ac.kr](mailto:aaron@postech.ac.kr) (J.-W.L.); [kihwan@postech.ac.kr](mailto:kihwan@postech.ac.kr) (K.K.); [ta2two@postech.ac.kr](mailto:ta2two@postech.ac.kr) (D.Y.); [smkds@postech.ac.kr](mailto:smkds@postech.ac.kr) (D.S.K.)

<sup>2</sup> Department of Electrical Engineering, Pohang University of Science and Technology (POSTECH), Pohang 37673, Republic of Korea; [jysim@postech.ac.kr](mailto:jysim@postech.ac.kr) (J.-Y. S.)

<sup>3</sup> Agency for Defense Development (ADD), Daejeon 34186, Republic of Korea; [energysong@add.re.kr](mailto:energysong@add.re.kr) (I.S.)

\* Correspondence: [whwang@postech.ac.kr](mailto:whwang@postech.ac.kr) (W.H.); Tel.: +82-54-279-2174

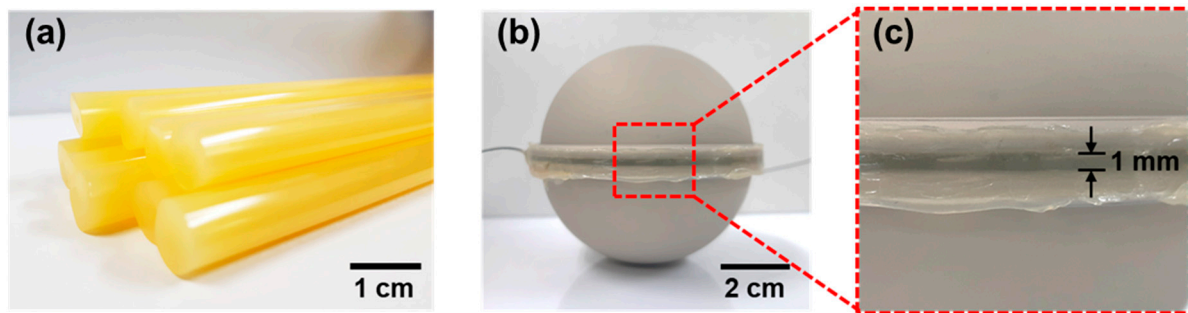

**Figure S1** (a) Polyamide hot melt glue stick (b) Picture of the hemisphere shell with polyamide adhesive on the edge (c) Thickness of polyamide adhesive

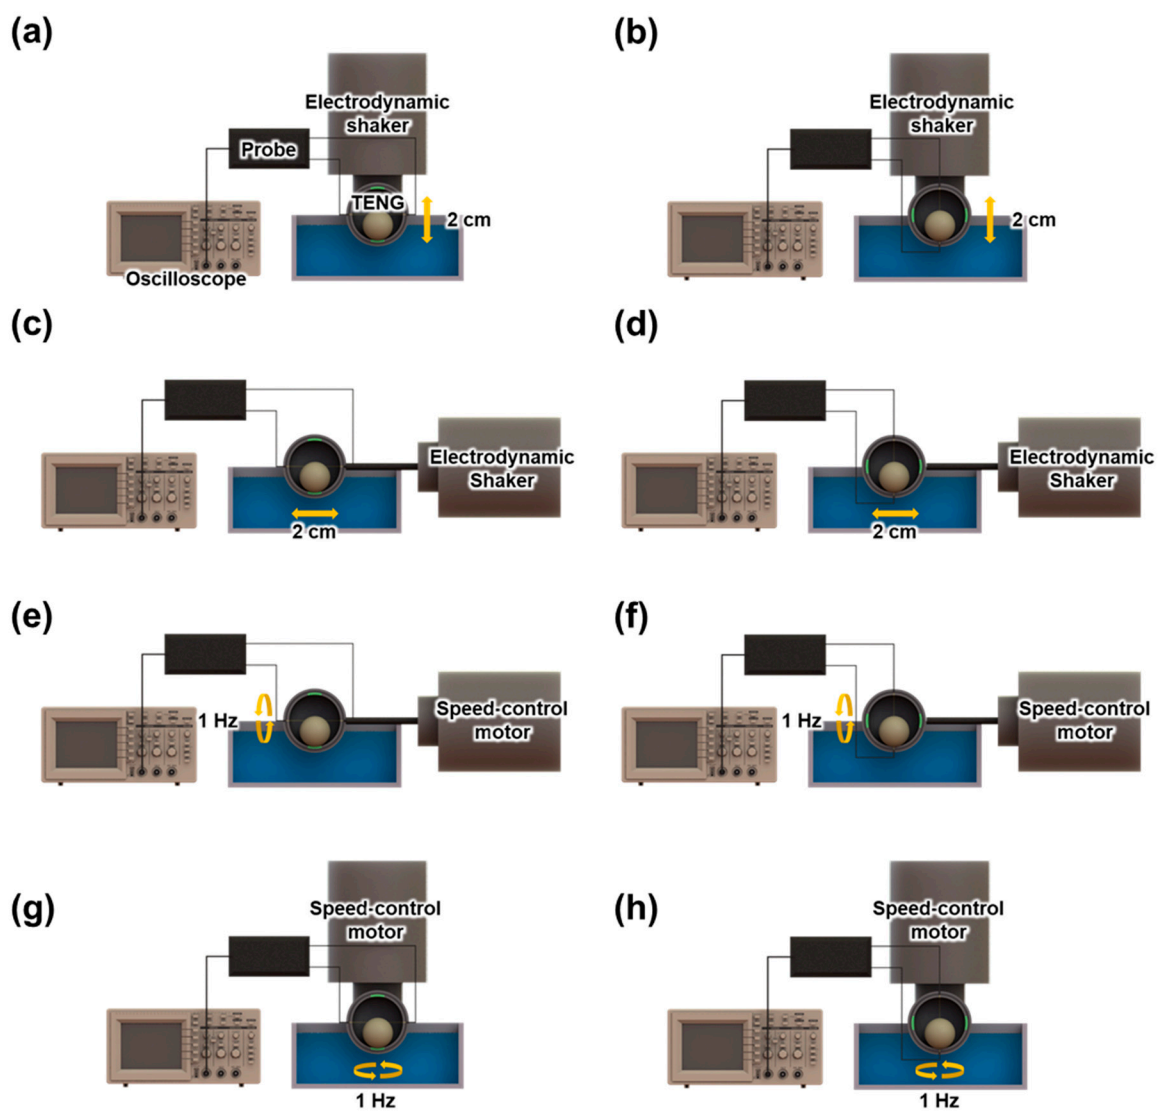

**Figure S2** Schematic diagram of the experiments: (a,b) during vertical vibration with respect to the (a) z and (b) x axes; (c,d) during horizontal vibration with respect to the (c) x and (b) z axes; (e,f) during rotation with respect to the (e) x axis and (f) z axis parallel to the water surface; (g,h) during rotation with respect to the (g) z axis and (h) x axis perpendicular to the water surface.

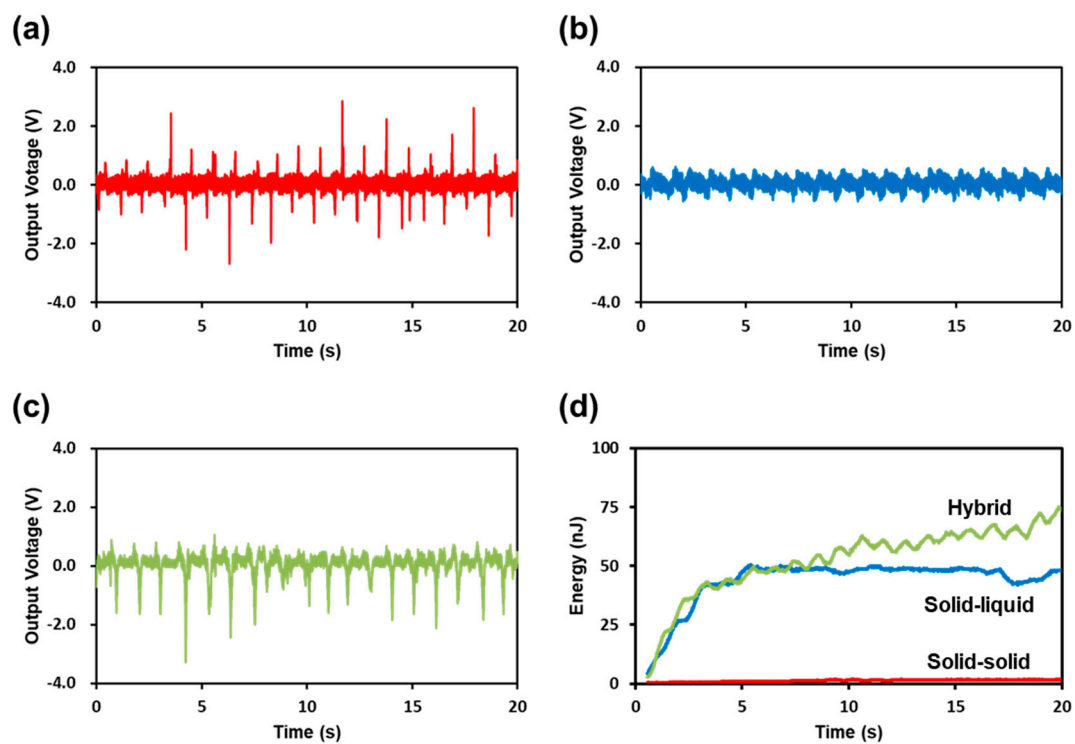

**Figure S3** Electrical output of the TENG under wave motion with a frequency of 1 Hz in (a) solid-solid, (b) solid-liquid, and (c) hybrid triboelectrification. (d) Charged energy of the 1  $\mu$ F capacitor with a 1 Hz wave frequency
